# Supplementary material for: Membrane translocation process revealed by in situ structures of type II secretion system secretins
Source: PubMed Central journal article supplement (PMC10329019; doi:10.1038/s41467-023-39583-2), 2023-07-07
Supplement: 41467_2023_39583_MOESM3_ESM.pdf [file 41467_2023_39583_MOESM3_ESM.pdf]

## Description of Additional Supplementary Files

### **Movie Legends**

**Supplementary Movie 1.** Visualization of GspD $\alpha$  on the E. coli inner membrane. IM, inner membrane; OM, outer membrane; PG, peptidoglycan.

**Supplementary Movie 2.** The symmetry release of GspD $\alpha$  and the movement of GspD $\alpha$  on the inner membrane. IM, inner membrane.
